# Supplementary material for: Software tools for visualizing Hi-C data
Source: PubMed Central journal article supplement (PMC5290626; doi:10.1186/s13059-017-1161-y), 2017-02-03
Supplement: 13059_2017_1161_MOESM1_ESM.pdf [file 13059_2017_1161_MOESM1_ESM.pdf]

| First author | Year | Journal                  | Cell types                     | Assay              | Organism               |
|--------------|------|--------------------------|--------------------------------|--------------------|------------------------|
| Sanborn      | 2015 | <i>PNAS</i>              | HAP1                           | Capture Hi-C, COLA | Human                  |
| Darrow       | 2015 | <i>PNAS</i>              | RPE1, GM12878, AG08312, Patski | Hi-C               | Human, Rhesus, Mouse   |
| Kalhor       | 2011 | <i>Nat Biotech</i>       | GM12878                        | TCC                | Human                  |
| Hou          | 2012 | <i>Molecular Cell</i>    | Kc167                          | Hi-C               | Fruitfly               |
| Li           | 2012 | <i>Cell</i>              | HCF116,HeLA,K562,MCF7,NB4      | ChIA-PET           | Human                  |
| Lin          | 2012 | <i>Nature Immunology</i> | ProB                           | Hi-C               | Mouse                  |
| Moissiard    | 2012 | <i>Science</i>           | Arabidopsis                    | Hi-C               | Arabidopsis            |
| Rickman      | 2012 | <i>PNAS</i>              | RWEP-1                         | Hi-C               | Human                  |
| Sanyal       | 2012 | <i>Nature</i>            | GM12878                        | 5-C                | Human                  |
| Sexton       | 2012 | <i>Cell</i>              | Drosophila Embryo              | Hi-C               | Fruitly                |
| Zhang        | 2012 | <i>Cell</i>              | ProB                           | Hi-C               | Mouse                  |
| Jin          | 2012 | <i>Nature</i>            | IMR90                          | Hi-C               | Human                  |
| McCord       | 2013 | <i>Genome Research</i>   | Fibroblast                     | Hi-C               | Human                  |
| Nagano       | 2013 | <i>Nature</i>            | TH1                            | Single Cell Hi-C   | Mouse                  |
| Naumova      | 2013 | <i>Cell</i>              | HFF,HeLaS3,K562                | Hi-C               | Human                  |
| Seitan       | 2013 | <i>Genome Research</i>   | Thymocyte                      | Hi-C               | Human                  |
| Sofuova      | 2013 | <i>EMBO Journal</i>      | neural stem cells, astrocytes  | Hi-C               | Mouse                  |
| Wang         | 2013 | <i>PLoS One</i>          | B-ALL,CALL-4,RL                | Hi-C               | Human                  |
| Zuin         | 2013 | <i>PNAS</i>              | HEK293T                        | Hi-C               | Human                  |
| Ay           | 2014 | <i>Genome Research</i>   | 3D7                            | Hi-C               | <i>P. falciparium</i>  |
| Feng         | 2014 | <i>Molecular Cell</i>    |                                | Hi-C               | Arabidopsis            |
| Grob         | 2014 | <i>Molecular Cell</i>    |                                | Hi-C               | Arabidopsis            |
| Ma           | 2014 | <i>Nature Methods</i>    | K562,H1                        | DNase Hi-C         | Human                  |
| Rudan        | 2015 | <i>Cell Reports</i>      | Liver                          | Hi-C               | Rabbit, Macaque, Mouse |
| Xie          | 2015 | <i>Molecular Plant</i>   | Arabidopsis                    | Hi-C               | Arabidopsis            |

Table S1: Chromosome conformation experiments available with Juicebox.
